# Supplementary figures and images for: Development of methodology for Raman microspectroscopic analysis of oral exfoliated cells
Source: Royal Society of Chemistry journal article supplement (doi:10.1039/c6ay03360a), 2017-01-01

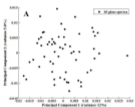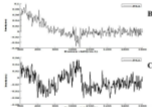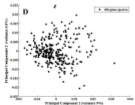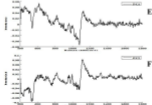

Supplement: c6ay03360a2.pdf [file c6ay03360a2.pdf]
